# Supplementary material for: Outlier Detection and Correction for Monitoring Data of Water Quality Based on Improved VMD and LSSVM
Source: Hindawi journal article supplement (doi:10.1155/2019/9643921), 2019-01-01
Supplement: f1 [file 9643921.f1.docx]

Description for the graphical abstract

In this paper, a model of outlier detection and correction for monitoring data of water quality is proposed, in which the improved VMD algorithm and LSSVM algorithm are used for outlier detection and repair respectively. At the end of the paper, the algorithm package of the model is applied to the software platform of water quality parameter monitoring and trend prediction developed by ourselves and good results are achieved.

graphical abstract
